# Supplementary material for: Combined Optical-Electrical Optimization of Cd1−xZnxTe/Silicon Tandem Solar Cells
Source: MDPI journal article supplement (doi:10.3390/ma13081860), 2020-04-15
Supplement: s1 [file s1]

# Combined Optical-Electrical Optimization of $\text{Cd}_{1-x}\text{Zn}_x\text{Te}$ /Silicon Tandem Solar Cells

Mehmet Koç<sup>1,2</sup>, Giray Kartopu<sup>3</sup> and Selcuk Yerci<sup>1,2,4,\*</sup>

<sup>1</sup> The Center for Solar Energy Research and Applications (GUNAM), Ankara 06800, Turkey; mehmetkoc.ee@gmail.com

<sup>2</sup> Micro and Nanotechnology Department, Middle East Technical University, Ankara 06800, Turkey

<sup>3</sup> Centre for Solar Energy Research, OpTIC, Swansea University, St. Asaph Business Park, LL17 0JD, UK; giray.kartopu@swansea.ac.uk

<sup>4</sup> Department of Electrical and Electronics Engineering, Middle East Technical University, Ankara 06800, Turkey

\* Correspondence: syerci@metu.edu.tr; Tel.: +90 (312) 210-2344

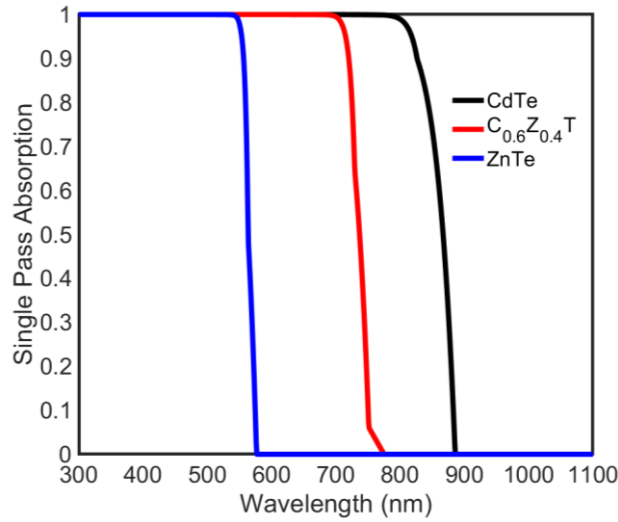

**Figure 1.** Single-pass absorption spectra for 3  $\mu\text{m}$  thick top cell active absorber ( $\text{CdTe}$ ,  $\text{C}_{0.6}\text{Z}_{0.4}\text{T}$  and  $\text{ZnTe}$ ) obeying the Beer-Lambert Law for the incident light as a function of wavelength.

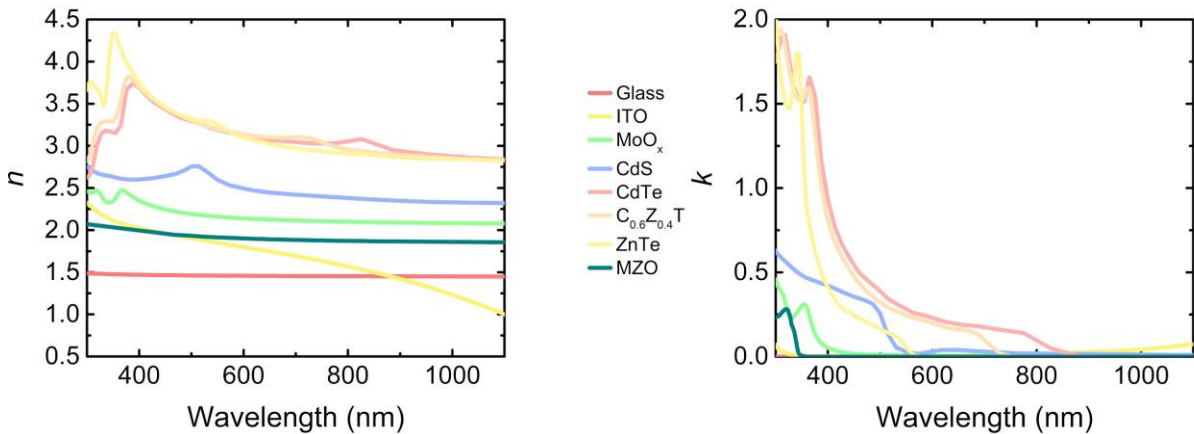

**Figure 2.** Refractive index ( $n$ ) and extinction coefficient ( $k$ ) of materials used in this study.

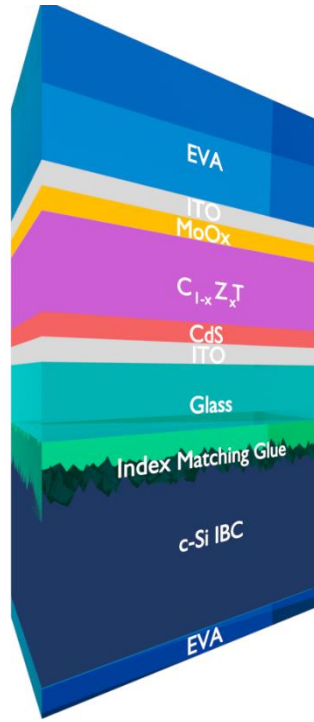

**Figure 3.** Schematic of the tandem device with inverted top cell structure. Front and rear TCOs are ITO; ETL is CdS; HTL is MoO<sub>x</sub>; and an index matching glue is employed between two cells. EVA is used to protect IBC Si cell contacts; glass is employed as the substrate.

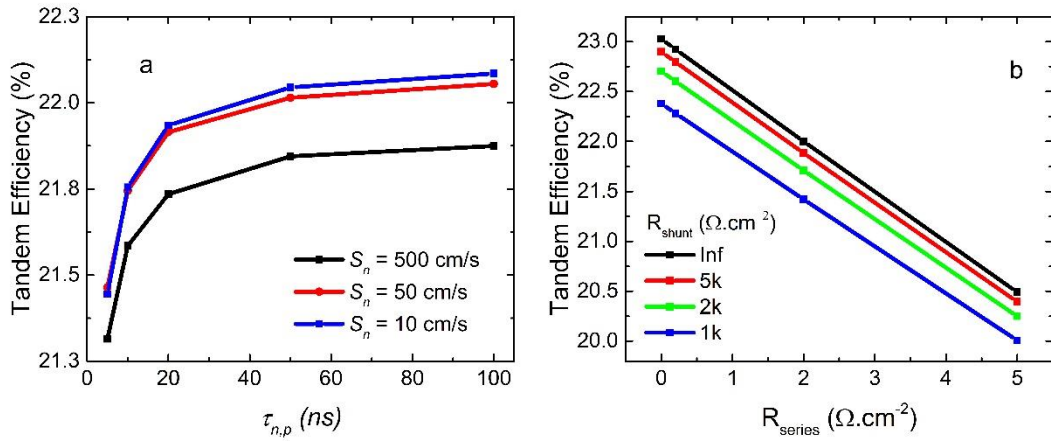

**Figure 4.** CdTe/IBC Si tandem efficiency as a function of (a) lifetime for three surface recombination velocities (10, 50 and 500 cm/s) for a 3  $\mu m$  CdTe absorber and (b) series resistance for four shunt resistances (Infinite, 5k, 2k and 1k  $\Omega/cm^2$ ) for a lifetime of 5 ns and surface recombination velocity of 500 cm/s. CdS is used as the ETL.

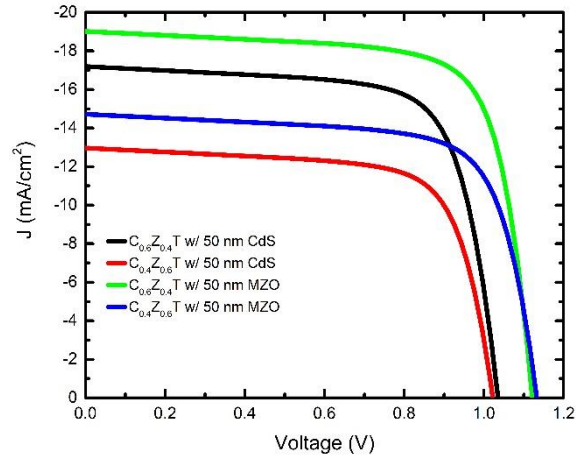

**Figure 5.** Top cell J-V curves of selected  $C_{1-x}Z_xT$  cases ( $x = 0.4, 0.6$ ) with 50 nm ETL of CdS and MZO.

**Table 1.** Simulation parameters of solar cells used in SCAPS 1-D.

|                                     | CdTe                 | $C_{0.8}Z_{0.2}T$    | $C_{0.6}Z_{0.4}T$    | $C_{0.4}Z_{0.6}T$    | $C_{0.2}Z_{0.8}T$    | ZnTe                 | CdS                  | MZO                  | ITO                |
|-------------------------------------|----------------------|----------------------|----------------------|----------------------|----------------------|----------------------|----------------------|----------------------|--------------------|
| $E_g$ (eV)                          | 1.45                 | 1.54                 | 1.69                 | 1.85                 | 2.03                 | 2.19                 | 2.4                  | 3.6                  | 3.72               |
| $\chi$ (eV)                         | 4.28                 | 4.23                 | 4.03                 | 3.87                 | 3.69                 | 3.53                 | 4.3                  | 4.2                  | 4.5                |
| CB eff. DOS<br>( $\text{cm}^{-3}$ ) | $1.5 \times 10^{18}$ | $1.5 \times 10^{18}$ | $1.5 \times 10^{18}$ | $1.5 \times 10^{18}$ | $1.5 \times 10^{18}$ | $1.5 \times 10^{18}$ | $2.1 \times 10^{18}$ | $2.1 \times 10^{18}$ | $4 \times 10^{19}$ |
| VB eff. DOS<br>( $\text{cm}^{-3}$ ) | $1.8 \times 10^{19}$ | $1.8 \times 10^{19}$ | $1.8 \times 10^{19}$ | $1.8 \times 10^{19}$ | $1.8 \times 10^{19}$ | $1.8 \times 10^{19}$ | $1.7 \times 10^{19}$ | $1.7 \times 10^{19}$ | $1 \times 10^{18}$ |
| $V_{te}$ (cm/V.s)                   | $1 \times 10^7$      | $1 \times 10^7$      | $1 \times 10^7$      | $1 \times 10^7$      | $1 \times 10^7$      | $1 \times 10^7$      | $1 \times 10^7$      | $1 \times 10^7$      | $1 \times 10^7$    |
| $V_{th}$ (cm/V.s)                   | $1 \times 10^7$      | $1 \times 10^7$      | $1 \times 10^7$      | $1 \times 10^7$      | $1 \times 10^7$      | $1 \times 10^7$      | $1 \times 10^7$      | $1 \times 10^7$      | $1 \times 10^7$    |
| $M_e$ ( $\text{cm}^2/\text{V.s}$ )  | 700                  | 700                  | 700                  | 700                  | 700                  | 700                  | 70                   | 70                   | 30                 |
| $M_h$ ( $\text{cm}^2/\text{V.s}$ )  | 60                   | 60                   | 60                   | 60                   | 60                   | 60                   | 20                   | 20                   | 5                  |
| $N_A$ ( $\text{cm}^{-3}$ )          | $1 \times 10^{16}$   | $1 \times 10^{16}$   | $1 \times 10^{16}$   | $1 \times 10^{16}$   | $1 \times 10^{16}$   | $1 \times 10^{16}$   | -                    | -                    | -                  |
| $N_D$ ( $\text{cm}^{-3}$ )          | -                    | -                    | -                    | -                    | -                    | -                    | $1.2 \times 10^{18}$ | $1.2 \times 10^{18}$ | $1 \times 10^{21}$ |

$E_g$ : bandgap;  $\chi$ : electron affinity, DOS: density of states;  $V_{te}$ : electron velocity;  $V_{th}$ : hole velocity;  $M_e$ : electron mobility;  $M_h$ : hole mobility;  $N_A$ : acceptor density;  $N_D$ : donor density.
